# Supplementary material for: N and S co-doped nanosheet-like porous carbon derived from sorghum biomass: mechanical nanoarchitecturing for upgraded potassium ion batteries
Source: Royal Society of Chemistry journal article supplement (doi:10.1039/d3ta03215a), 2023-01-01
Supplement: d3ta03215a1.pdf [file d3ta03215a1.pdf]

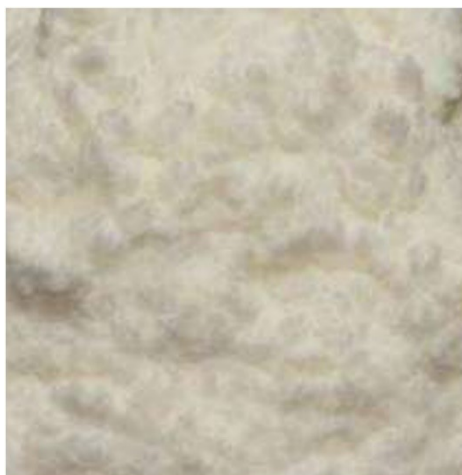

**Fig. S1.** Photograph of the delignified sorghum. \*Note: To capture a photograph, a solid sample was intentionally prepared through freeze-drying.

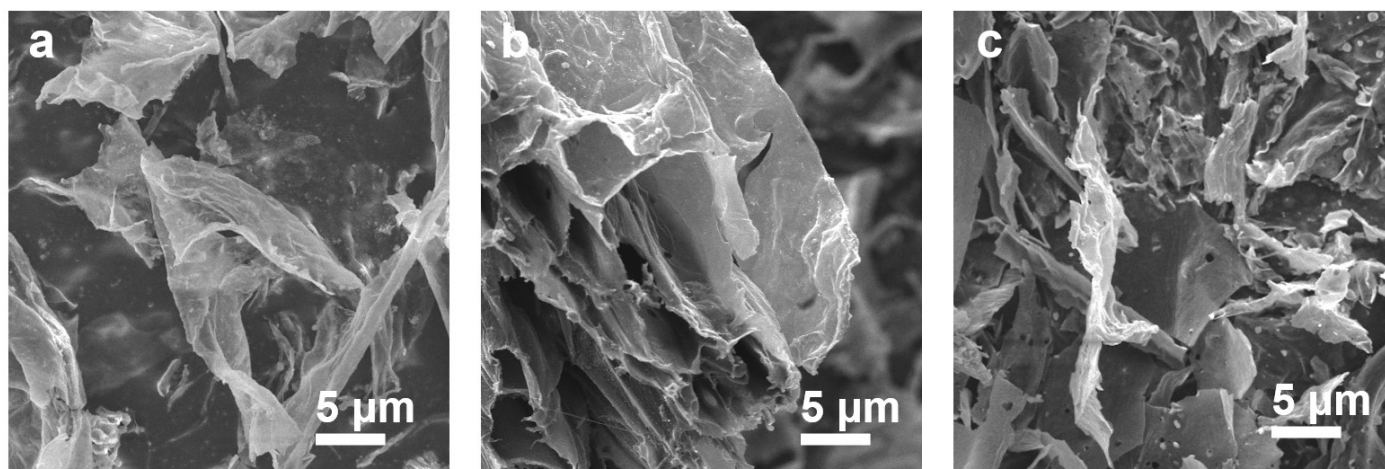

**Fig. S2.** FESEM images of (a) NSSC-400, (b) NSSC-800 and (c) NSSC-1000.

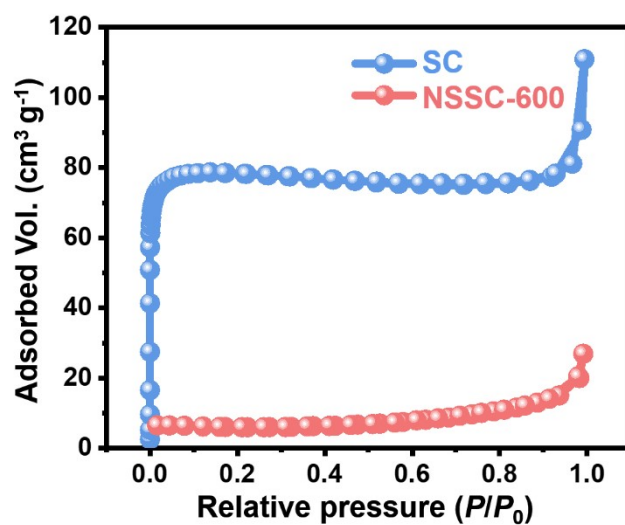

Fig. S3. Nitrogen adsorption-desorption isotherms of SC and NSSC-600.

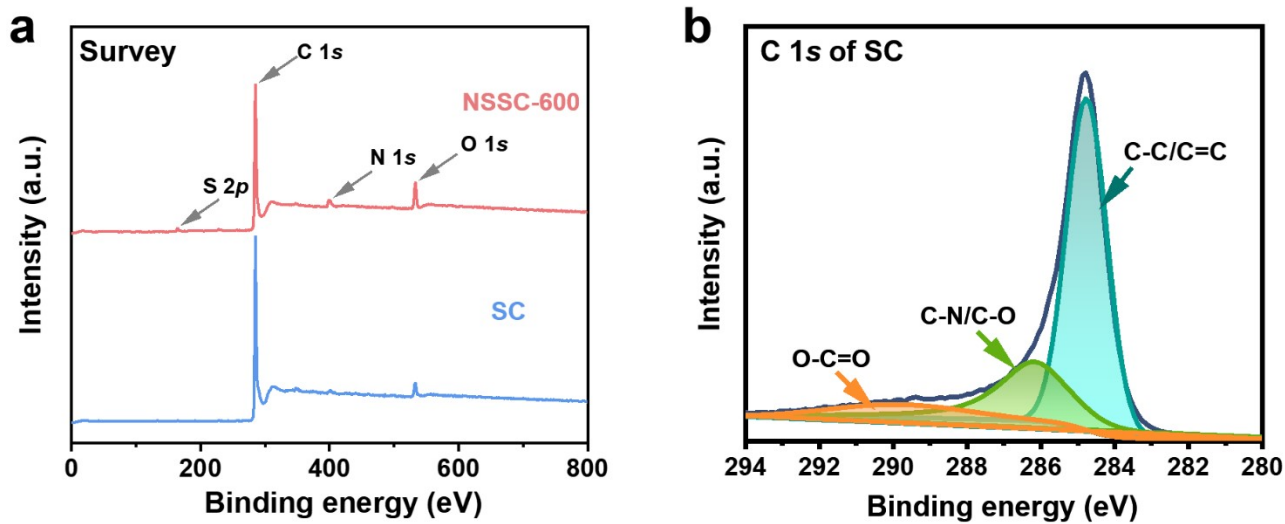

Fig. S4. (a) Survey XPS spectra of SC and NSSC-600. (b) High-resolution XPS for (a) C 1s of SC.

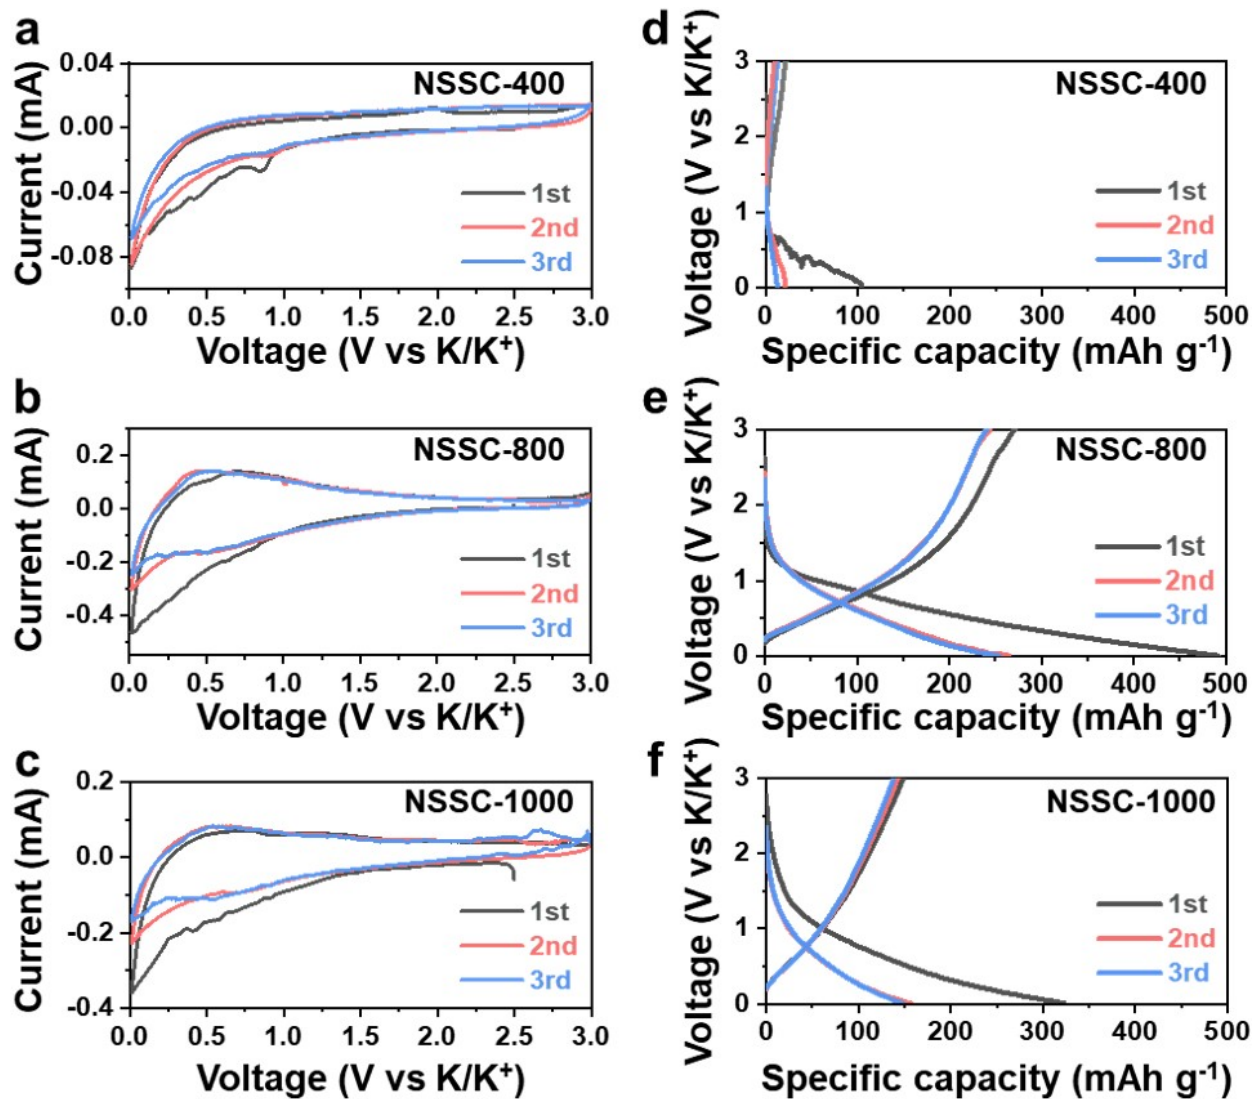

**Fig. S5.** CV curves of (a) NSSC-400, (b) NSSC-800 and (c) NSSC-1000. GCD curves of (d) NSSC-400, (e) NSSC-800 and (f) NSSC-1000.

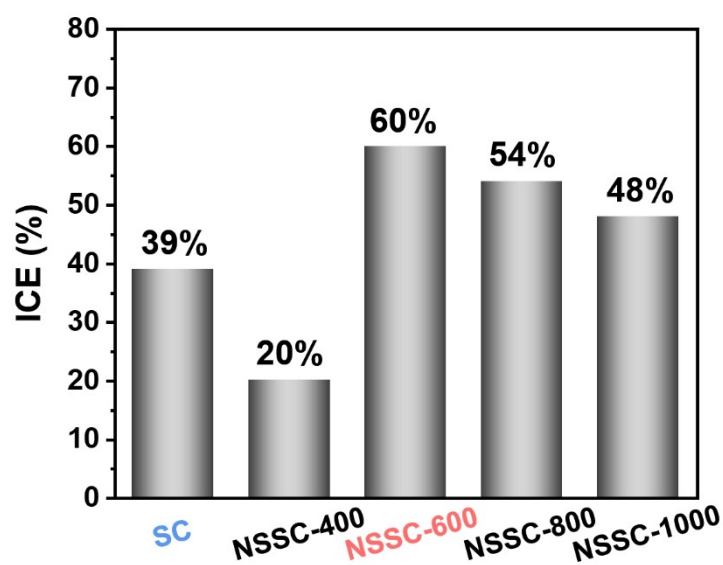

**Fig. S6.** Initial coulombic efficiency of SC, NSSC-400, NSSC-600, NSSC-800, and NSSC-1000 at the current density of 100 mA g<sup>-1</sup>.

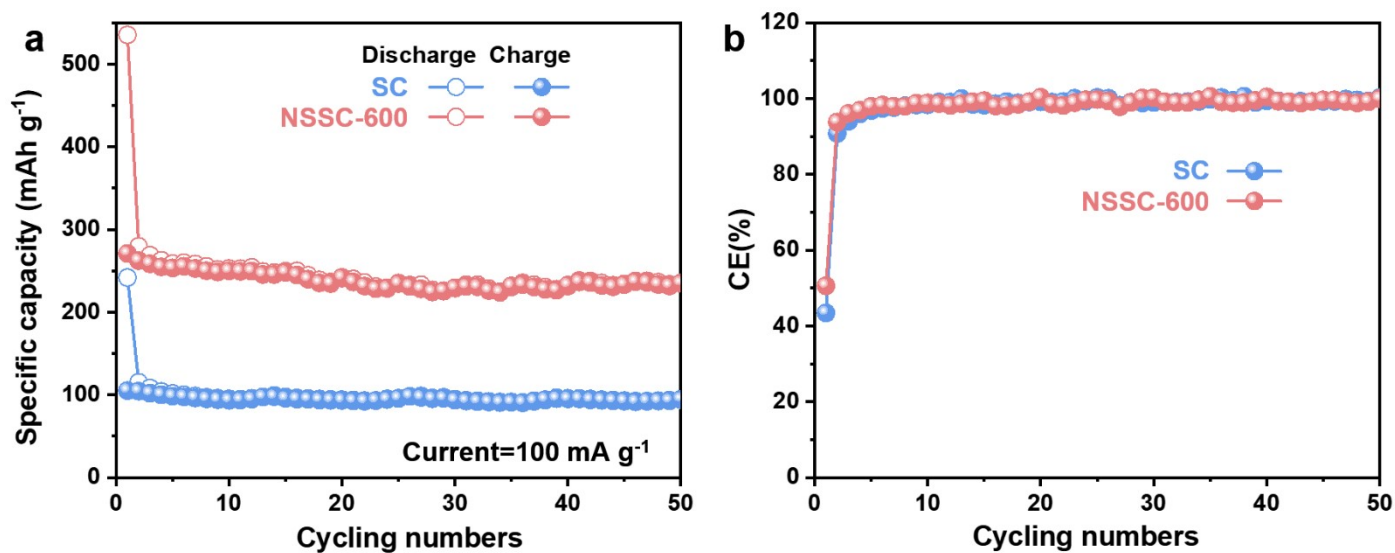

**Fig. S7.** (a) Cycling performance and (b) CE of SC and NSSC-600 at 100 mA g<sup>-1</sup>.

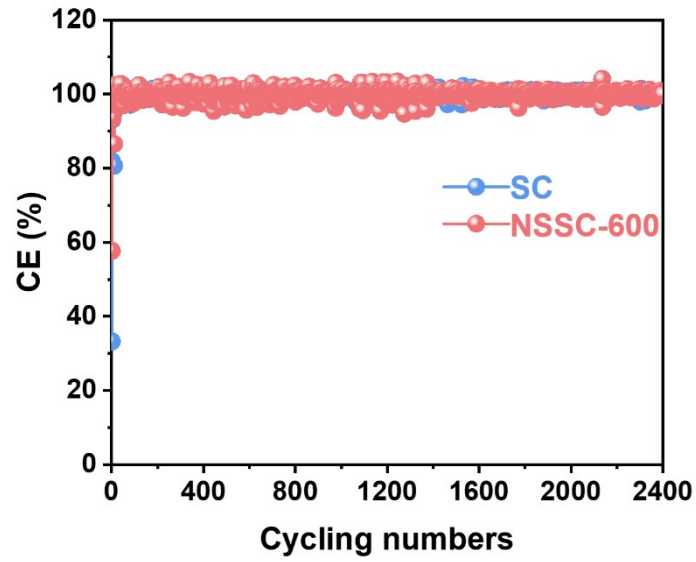

**Fig. S8.** Coulombic efficiency of SC and NSSC-600 at the current density of  $1 \text{ A g}^{-1}$ .

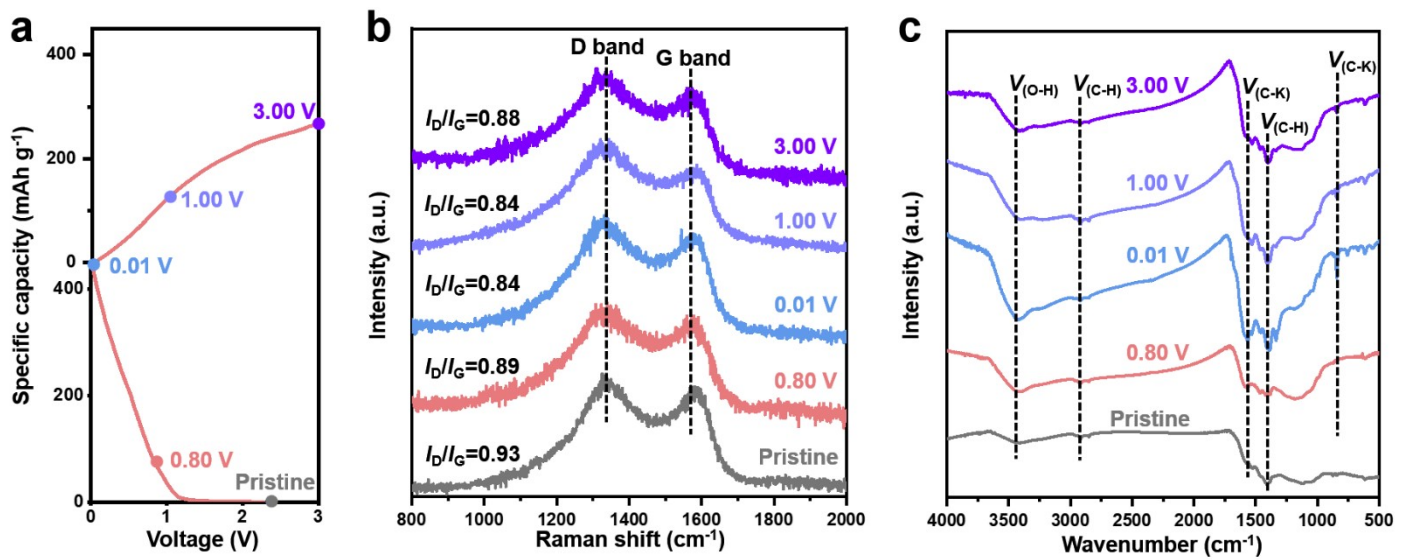

**Fig. S9.** (a) Charge-discharge profile, the corresponding (b) *ex situ* Raman of NSSC-600 and (c) *ex situ* FTIR spectra of NSSC-600 from 0.01 to 3.00 V.

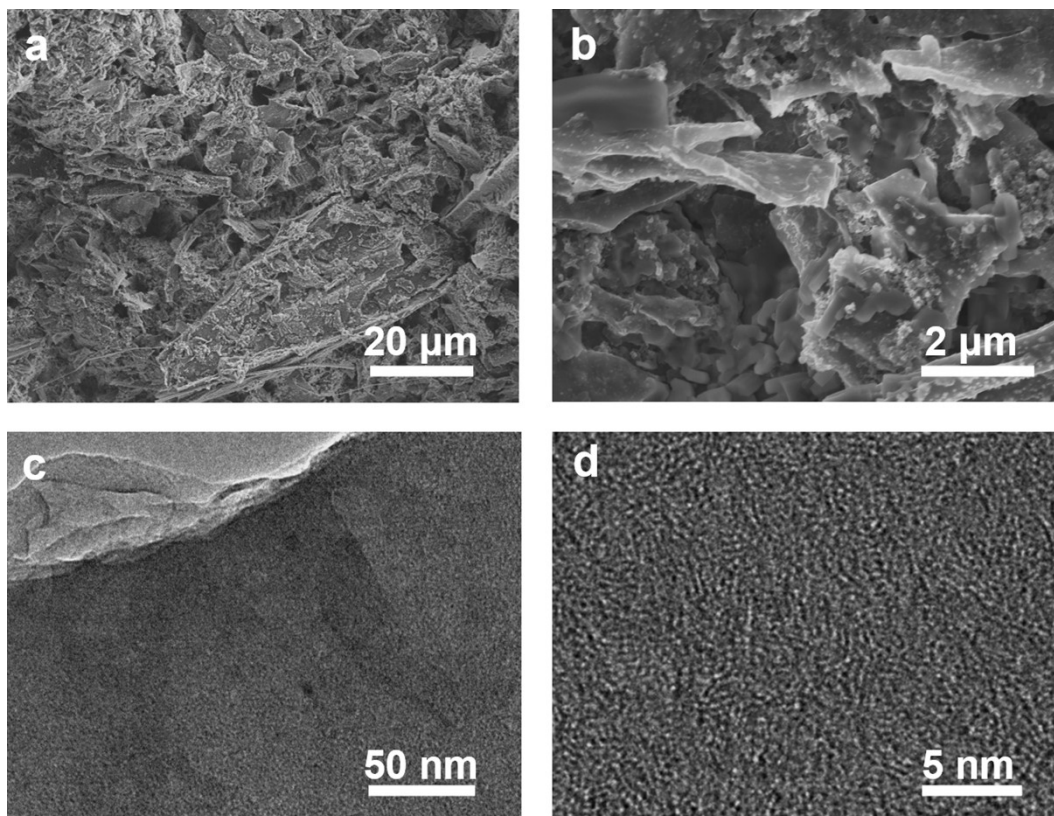

**Fig. S10.** (a, b) FESEM, (c) TEM and (d) high-resolution TEM images of NSSC-600 after 50 cycles at 100 mA g<sup>-1</sup>. Note: Some particles shown in (a) and (b) are the conductive agents added during electrode preparation.

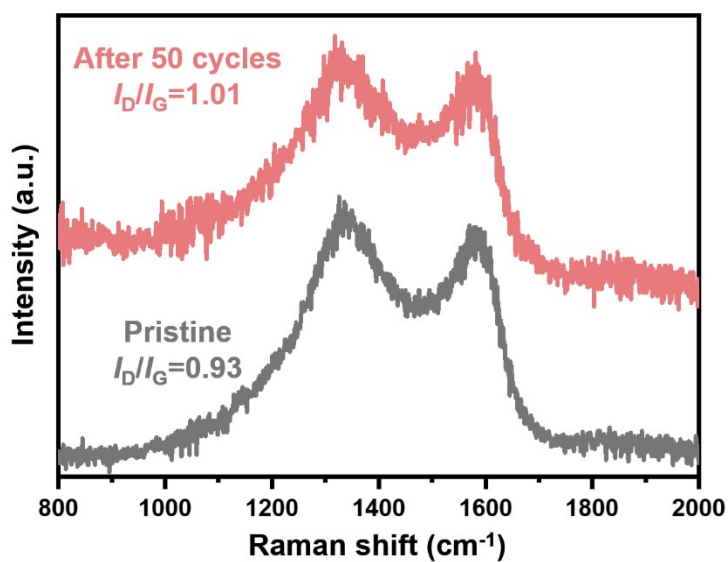

**Fig. S11.** Raman spectra of NSSC-600 before and after 50 cycles at 100 mA g<sup>-1</sup>.

**Table S1.** The content of C, H, N and S in NSSC-*x* obtained by CHNS analysis.

|           | S (at%) |
|-----------|---------|
| NSSC-400  | 0.96    |
| NSSC-600  | 1.62    |
| NSSC-800  | 1.23    |
| NSSC-1000 | 1.41    |

**Table S2.** The obtained parameters based on DFT calculation.

| System | $E_2$ (eV) | $E_1$ (eV) | $\mu_K$ (eV) | $\Delta E_a$ (eV) |
|--------|------------|------------|--------------|-------------------|
| C      | -318.95    | -316.82    | -0.253       | -1.87             |
| N-C    | -320.06    | -317.62    | -0.253       | -2.19             |
| S-C    | -322.55    | -319.16    | -0.253       | -3.13             |
| N-S-C  | -323.55    | -319.90    | -0.253       | -3.40             |

**Table S3** Summary table of previously reported N, S co-doped carbons for KIBs.

| Electrode material                    | raw material                                                 | Cycling stability[capacity (mAh g <sup>-1</sup> ) @Cycle number @current density (A g <sup>-1</sup> )] | Rate capability [capacity (mAh g <sup>-1</sup> ) @ current density (A g <sup>-1</sup> )] | ICE(%) | Ref.     |
|---------------------------------------|--------------------------------------------------------------|--------------------------------------------------------------------------------------------------------|------------------------------------------------------------------------------------------|--------|----------|
| N, S co-doped porous carbon nanotubes | Polymerized dopamine and CdS                                 | 188@500@2                                                                                              | 151@5                                                                                    | 18.7   | 1        |
| N, S co-doped graphene nanoribbons    | MWCNTs                                                       | 224.0@400@0.5                                                                                          | 211.7@2                                                                                  | 55.06  | 2        |
| N, S co-doped porous carbon           | Glucan                                                       | ~140@100@0.5                                                                                           | ~60@1                                                                                    | /      | 3        |
| N, S co-doped carbon nanosheet        | Ethylene glycol with Sb <sub>2</sub> S <sub>3</sub> template | 187@2780@1                                                                                             | 251@2                                                                                    | ~25    | 4        |
| N, S co-doped porous carbon           | Sodium polyacrylate with NaCl-template                       | 156.8@1000@0.5                                                                                         | 158.7@0.5                                                                                | 48.4   | 5        |
| N/S Co-doped Graphene Nanosheets      | F127 with melamine and cyanuric acid                         | 188.8@2000@1                                                                                           | 204.3@2                                                                                  | ~21    | 6        |
| NSSC                                  | Sorghum stalk                                                | 110@2400@1                                                                                             | 131@1                                                                                    | 60     | Our work |



**Table S4.** Summary table of previously reported biomass derived hard carbon for KIBs.

| Electrode material                 | raw material                   | Cycling stability [capacity (mAh g <sup>-1</sup> ) @Cycle number @current density (A g <sup>-1</sup> )] | Rate capability [capacity (mAh g <sup>-1</sup> ) @ current density (A g <sup>-1</sup> )] | ICE(%) | Ref. |
|------------------------------------|--------------------------------|---------------------------------------------------------------------------------------------------------|------------------------------------------------------------------------------------------|--------|------|
| Hard carbon                        | Magnolia grandiflora Lima leaf | 96@2000@2                                                                                               |                                                                                          | 50.3   | 7    |
| Porous carbon                      | Potato                         | 172@400@0.5                                                                                             | 152@1                                                                                    | 82.8   | 8    |
| N-doped hard carbon                | Corn stalk core                | 176@260@1                                                                                               | 118@2                                                                                    | 65     | 9    |
| N/P-doped hierarchical hard carbon | Animal bone                    | 205@450@0.058                                                                                           | 113@0.58                                                                                 | ~58    | 10   |
| Biomass carbon                     | Tea-waste                      | 211@1000@1                                                                                              | 223@1                                                                                    | 85.6   | 11   |
| Cage-like porous carbon            | Ganoderma lucidum spore        | 124.6@700@1                                                                                             | 133@1                                                                                    | 56     | 12   |
| N-doped porous carbon              | Bagasse                        | 100.4@400@0.2                                                                                           | ~50@1                                                                                    | ~25    | 13   |
| Porous N-doped carbon microsphere  | Shrimp shells                  | 180@4000@0.5                                                                                            | 156@5                                                                                    | ~65    | 14   |
| N-doped carbon nanofibers          | Bio-waste chitin               | 103.4@500@0.56                                                                                          | 84.7@1.4                                                                                 | 37.8   | 15   |
| Porous carbon nanofiber foam       | Bacterial cellulose            | 156@500@0.5                                                                                             | 164 @1                                                                                   | ~20    | 16   |
| Sulfur-doped charcoal              | Bamboo                         | 203.8@300@0.2                                                                                           | 124.2@1                                                                                  | 56     | 17   |
| Loofah-derived carbon              | Loofah                         | ~80@400@0.1                                                                                             | ~60@0.2                                                                                  | ~31    | 18   |
| N/O Co-doped porous carbon         | Cyanobacteria                  | 104.3@1000@1                                                                                            | 155@1                                                                                    | 38.7   | 19   |
| O/N-doped hard carbon              | Maple leaves                   | 141.9 @1000@1                                                                                           | 144.8@1                                                                                  | 30.1   | 20   |
| O/S co-doped hard carbon           | Cotton                         | 120@500@2                                                                                               | 135@2                                                                                    | 46.4   | 21   |
| Hard-carbon                        | Oak                            | 112@150@0.1                                                                                             | 41@0.5                                                                                   | 56     | 22   |
| Co-activation of carbon            | Artemisia hedinii              | 110@500@0.07                                                                                            | 75@0.418                                                                                 | 25.5   | 23   |

|                            |                 |             |       |      |          |
|----------------------------|-----------------|-------------|-------|------|----------|
| Porous hard carbon spheres | Camellia shells | 215@100@0.1 | 123@1 | 44.1 | 24       |
| NSSC                       | Sorghum stalk   | 110@2400@1  | 131@1 | 60   | Our work |

## Reference

1. X. Jin, X. Wang, Y. Liu, M. Kim, M. Cao, H. Xie, S. Liu, X. Wang, W. Huang, A. K. Nanjundan, B. Yulianto, X. Li and Y. Yamauchi, *Small*, 2022, **18**, 2203545.
2. J. Choi, A. Jin, H. D. Jung, D. Ko, J. H. Um, Y. J. Choi, S. H. Kim, S. Back, S.-H. Yu and Y. Piao, *Energy Storage Mater.*, 2022, **48**, 325-334.
3. W. Liu, Y. Yang, P. Liu, Y. Huang, P. Li, T. Chen, Y. Zhuo, J. Yan and K. Liu, *Solid State Ionics*, 2020, **356**, 115451.
4. J. Cao, J. Zhong, H. Xu, S. Li, H. Deng, T. Wang, L. Fan, X. Wang, L. Wang, J. Zhu, B. Lu and X. Duan, *Nano Res.*, 2022, **15**, 2040-2046.
5. H. Ma, X. Qi, D. Peng, Y. Chen, D. Wei, Z. Ju and Q. Zhuang, *ChemistrySelect*, 2019, **4**, 11488-11495.
6. W. Yang, J. Zhou, S. Wang, Z. Wang, F. Lv, W. Zhang, W. Zhang, Q. Sun and S. Guo, *ACS Energy Lett.*, 2020, **5**, 1653-1661.
7. Z. Zhu, W. Zhong, Y. Zhang, P. Dong, S. Sun, Y. Zhang and X. Li, *Carbon Energy*, 2021, **3**, 541-553.
8. W. Cao, E. Zhang, J. Wang, Z. Liu, J. Ge, X. Yu, H. Yang and B. Lu, *Electrochim. Acta*, 2019, **293**, 364-370.
9. W.-j. Deng, X.-d. He, L.-m. Zhang, J.-r. Wang and C.-h. Chen, *Energy Technol.*, 2021, **9**, 2100644.
10. X. Yuan, B. Zhu, J. Feng, C. Wang, X. Cai and R. Qin, *Mater. Res. Bull.*, 2021, **139**, 111282.
11. Z. Tang, Y. Wang, Z. Zheng and X. Luo, *J. Mater. Chem. A*, 2021, **9**, 9191-9202.
12. M. Yang, J. Dai, M. He, T. Duan and W. Yao, *J. Colloid Interf. Sci.*, 2020, **567**, 256-263.
13. Q. Deng, H. Liu, Y. Zhou, Z. Luo, Y. Wang, Z. Zhao and R. Yang, *J. Electroanal. Chem.*, 2021, **899**, 115668.
14. C. Chen, Z. Wang, B. Zhang, L. Miao, J. Cai, L. Peng, Y. Huang, J. Jiang, Y. Huang and L. Zhang, *Energy Storage Mater.*, 2017, **8**, 161-168.
15. R. Hao, H. Lan, C. Kuang, H. Wang and L. Guo, *Carbon*, 2018, **128**, 224-230.
16. H. Li, Z. Cheng, Q. Zhang, A. Natan, Y. Yang, D. Cao and H. Zhu, *Nano Lett.*, 2018, **18**, 7407-7413.
17. S. Tian, D. Guan, J. Lu, Y. Zhang, T. Liu, X. Zhao, C. Yang and J. Nan, *J. Power Sources*, 2020, **448**, 227572.
18. Z. Wu, L. Wang, J. Huang, J. Zou, S. Chen, H. Cheng, C. Jiang, P. Gao and X. Niu, *Electrochim. Acta*, 2019, **306**, 446-453.
19. Y. Sun, H. Xiao, H. Li, Y. He, Y. Zhang, Y. Hu, Z. Ju, Q. Zhuang and Y. Cui, *Chem. Eur. J.*, 2019, **25**, 7359-7365.
20. M. Liu, D. Jing, Y. Shi and Q. Zhuang, *J. Mater. Sci. Mater. Electron.*, 2019, **30**, 8911-8919.
21. B. Xu, S. Qi, F. Li, X. Peng, J. Cai, J. Liang and J. Ma, *Chin. Chem. Lett.*, 2020, **31**, 217-222.
22. S. R. Prabakar, S. C. Han, C. Park, I. A. Bhairuba, M. J. Reece, K.-S. Sohn and M. Pyo, *J. Electrochem. Soc.*, 2017, **164**, A2012.
23. J. Shan, J.-j. Wang, P. Kiekens, Y. Zhao and J.-j. Huang, *Solid State Sci.*, 2019, **92**, 96-105.
24. S. Chen, K. Tang, F. Song, Z. Liu, N. Zhang, S. Lan, X. Xie and Z. Wu, *Nanotechnol.*, 2021, **33**, 055401.
